# Supplementary material for: Co-Delivery of 8-Hydroxyquinoline Glycoconjugates and Doxorubicin by Supramolecular Hydrogel Based on α-Cyclodextrin and pH-Responsive Micelles for Enhanced Tumor Treatment
Source: MDPI journal article supplement (doi:10.3390/pharmaceutics14112490), 2022-11-17
Supplement: s1 [file s1]

## Supporting Information

### **Co-delivery of 8-Hydroxyquinoline Glycoconjugates and Doxorubicin by Supramolecular Hydrogel from $\alpha$ -Cyclodextrin and pH-responsive Micelles for Enhanced Tumor Treatment**

Adrian Domiński<sup>a\*</sup>, Tomasz Konieczny<sup>a</sup>, Marcin Godzierz<sup>a</sup>, Marta Musioł<sup>a</sup>, Henryk Janeczek<sup>a</sup>, Aleksander Foryś<sup>a</sup>, Monika Domińska<sup>b,c</sup>, Gabriela Pastuch-Gawołek<sup>b,c</sup>, Tomasz Piotrowski<sup>d</sup>, Piotr Kurcok<sup>a,\*</sup>

<sup>a</sup> Centre of Polymer and Carbon Materials, Polish Academy of Sciences, 34, M. Curie-Skłodowskiej St, 41-819 Zabrze, Poland

<sup>b</sup> Department of Organic Chemistry, Bioorganic Chemistry and Biotechnology, Faculty of Chemistry, Silesian University of Technology, Krzywoustego 4, 44-100 Gliwice, Poland

<sup>c</sup> Biotechnology Centre, Silesian University of Technology, B. Krzywoustego 8, 44-100 Gliwice, Poland

<sup>d</sup> Department of Chemical Organic Technology and Petrochemistry, Faculty of Chemistry, Silesian University of Technology, Bolesława Krzywoustego 4, 44-1100 Gliwice, Poland

\*Correspondence: [piotr.kurcok@cmpw-pan.edu.pl](mailto:piotr.kurcok@cmpw-pan.edu.pl), [adominski@cmpw-pan.edu.pl](mailto:adominski@cmpw-pan.edu.pl)

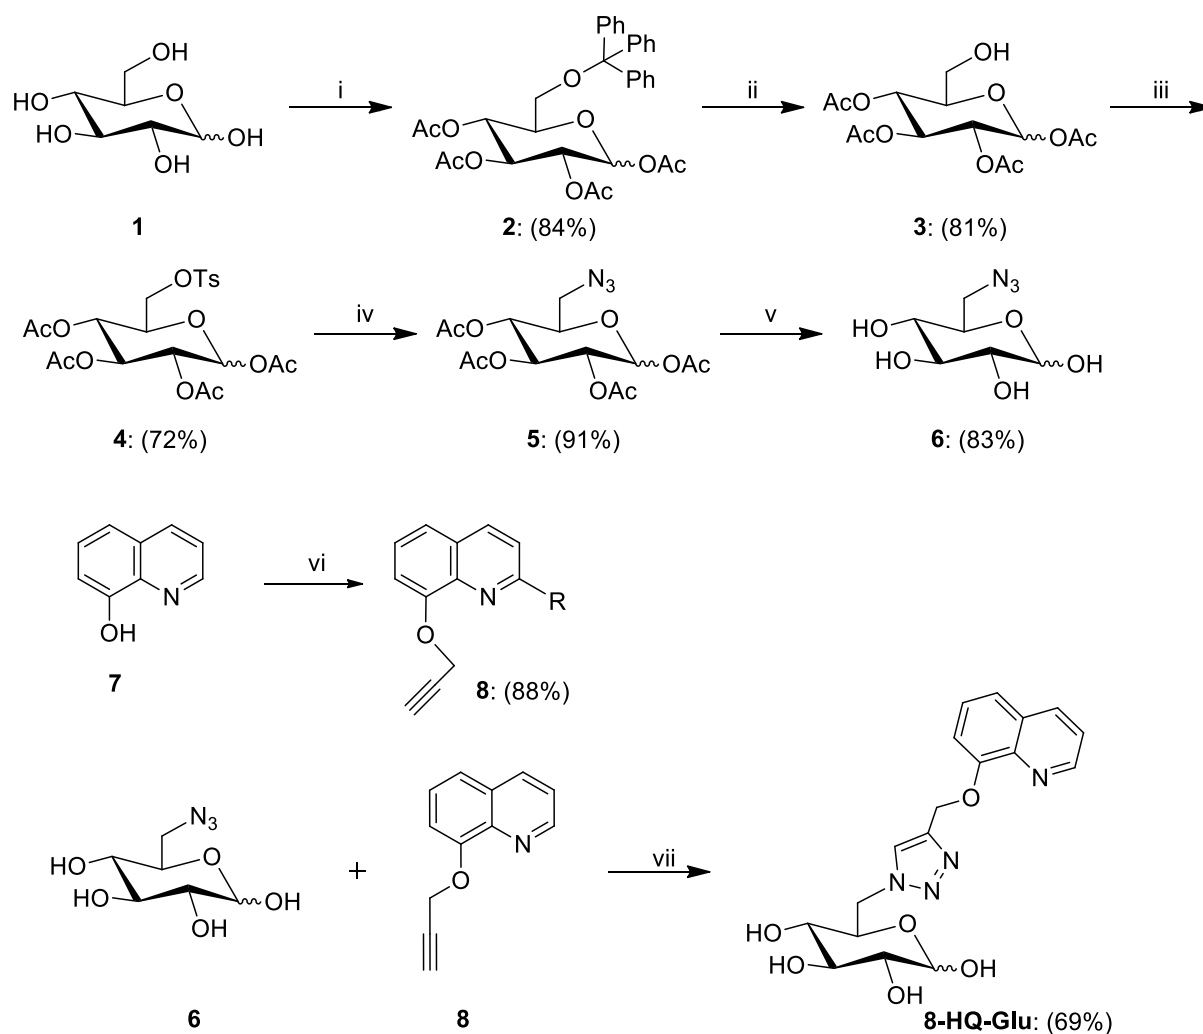

**Fig. S1.** Synthesis of 8HQ-Glu (6-(4-(8-quinolinylloxymethyl)-1H-1,2,3-triazol-1-yl)-6-deoxy-D-glucopyranose). Reagents and Conditions: (i) 1. trityl chloride, DMAP, pyridine, r.t., 24 h; 2.  $\text{CH}_3\text{COCl}$ , pyridine, r.t., 1h; (ii)  $\text{CH}_3\text{COOH}$ , 33%  $\text{HBr}/\text{AcOH}$ , 0 °C-r.t., 1 h; (iii) p-TsCl, DMAP, pyridine, r.t., 24 h; (iv)  $\text{NaN}_3$ , DMF, 80 °C, 2 h; (v) 1. MeONa, MeOH, r.t., 0.5 h; 2. Amberlyst-15; (vi) propargyl bromide,  $\text{K}_2\text{CO}_3$ , acetone, r.t., 24 h; (vii)  $\text{CuSO}_4 \cdot 5\text{H}_2\text{O}$ , NaAsc, i-PrOH/THF/ $\text{H}_2\text{O}$  (1:1:1, v:v:v), r.t., 24 h.

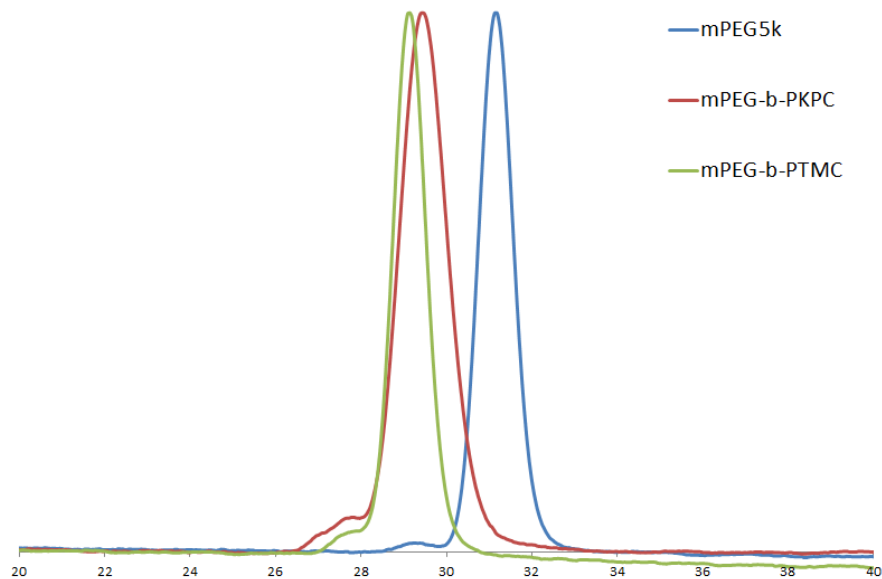

**Fig. S2.** Size exclusion chromatograms of mPEG5k, mPEG-*b*-PKPC and mPEG-*b*-PTMC (in DMF, calibrated against PEG standards).

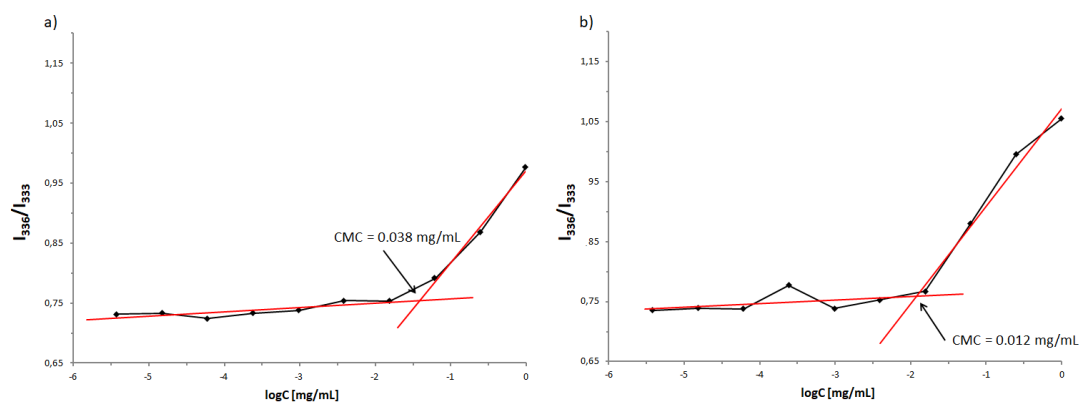

**Fig. S3.** Self-assembled critical micelle concentration of a) mPEG-*b*-PKPC and b) mPEG-PKPC-*b*-PTMC.

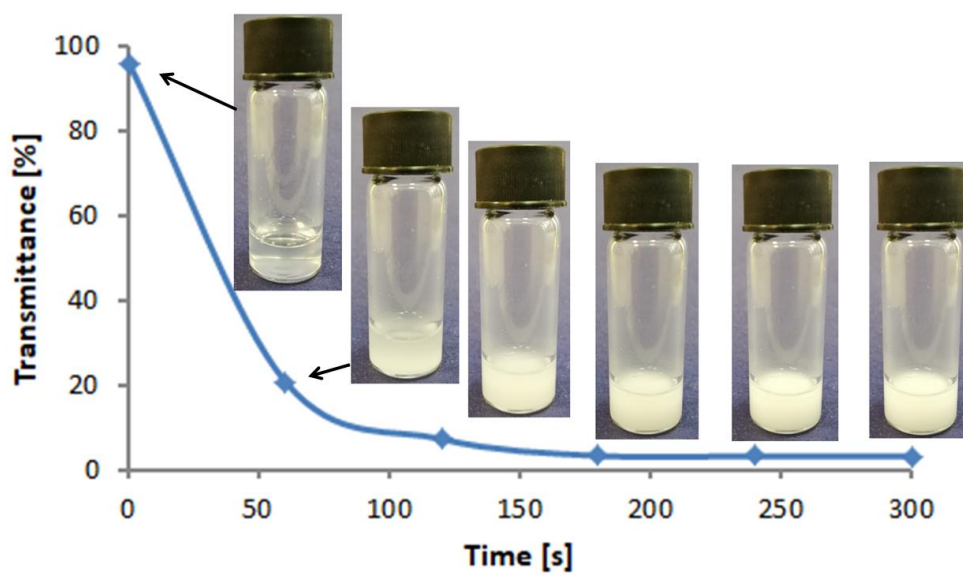

**Fig. S4.** Time-dependent solution transmittance plot of mPEG-b-PKPC<sup>mic</sup> (15 mg mL<sup>-1</sup>) and α-CD (10%) mixture.

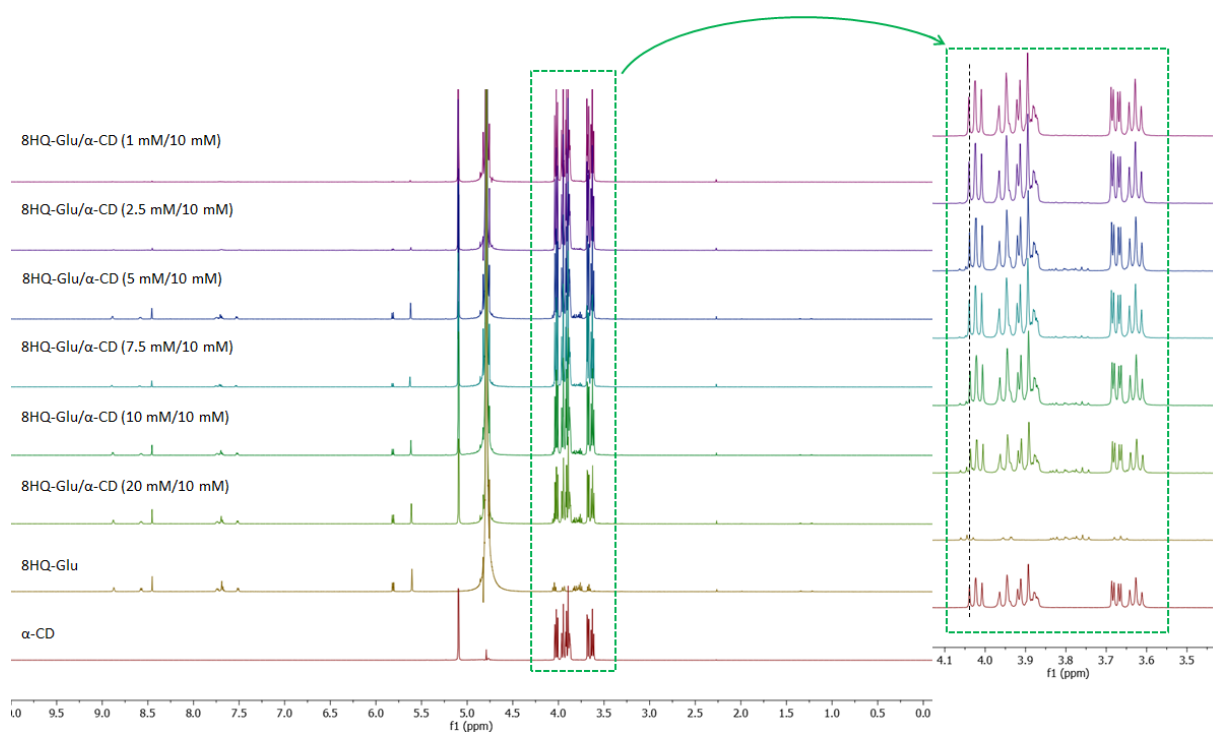

**Fig. S5.** <sup>1</sup>H NMR (600 MHz, D<sub>2</sub>O) spectra of α-CD and 8HQ-Glu and their mixture at different molar ratios.
